# Supplementary material for: Exposures to Particulate Matter from the Eruptions of the Puyehue Volcano and Birth Outcomes in Montevideo, Uruguay
Source: PubMed Central journal article supplement (PMC5089889; doi:10.1289/ehp235), 2016-05-06
Supplement: EHP235.s001.acco.pdf [file EHP235.s001.acco.pdf]

**Note to readers with disabilities:** *EHP* strives to ensure that all journal content is accessible to all readers. However, some figures and Supplemental Material published in *EHP* articles may not conform to [508 standards](#) due to the complexity of the information being presented. If you need assistance accessing journal content, please contact [ehp508@niehs.nih.gov](mailto:ehp508@niehs.nih.gov). Our staff will work with you to assess and meet your accessibility needs within 3 working days.

## **Supplemental Material**

### **Exposures to Particulate Matter from the Eruptions of the Puyehue Volcano and Birth Outcomes in Montevideo, Uruguay**

Ana Ines Balsa, Marcelo Caffera, and Juanita Bloomfield

#### **Table of Contents**

**Table S1:** categorical analysis controlling for activity in thermal power plants and oil refinery (all pregnancies, n=79,328; term births, n=72,920)

**Table S2:** Categorical effects of PM10 on birth outcomes controlling for CO, NO<sub>2</sub>, SO<sub>2</sub> (all pregnancies, n=79,252; term births, n=72,920)

**Table S3:** Categorical effects of PM10 on birth outcomes controlling for CO (all pregnancies, n=79,297; term births, n=72,920)

**Table S4:** Categorical effects of PM10 on birth outcomes controlling for SO<sub>2</sub> (all pregnancies, N=79,323; term births, N=72,920)

**Table S5:** Categorical effects of PM10 on birth outcomes controlling for NO<sub>2</sub> (all pregnancies, n=79,277; term births, n=72,920)

**Table S6:** Excluding observations with missing values on eclampsia, hypertension, parity, and smoking (all pregnancies, n=63,865; term births, n=58,713)

**Table S7:** Categorical effects of PM10 on birth outcomes for pregnancies conceived before or during the volcano eruptions (all pregnancies, n=51,106; term births, n=46,883)

**Table S8:** Categorical effects of PM10 on birth outcomes for pregnancies conceived during or after the volcano eruptions (all pregnancies, n=53,969; term births, n=50,147 (BW), n=50,135 (LBW))

**Table S9:** Effects of average PM10 concentration on birth outcomes for pregnancies not exposed to the volcano eruptions (all pregnancies, n=53,062; term births, n=48,699)

**Table S10:** Categorical effects of PM10 on birth outcomes for pregnancies not exposed to the volcano eruptions (all pregnancies, n=53,019; term births, n=48,699)

**Table S11:** Substituting 1<sup>st</sup> trimester pollution and weather values for residuals of these measures on their respective values for the 2<sup>nd</sup> and 3<sup>rd</sup> trimesters (all pregnancies, n=79,328; term births, n=72,920)

**Table S12:** Substituting 2<sup>nd</sup> trimester pollution and weather values for residuals of these measures on their respective values for 1<sup>st</sup> and 3<sup>rd</sup> trimesters (all pregnancies, n=79,328; term births, n=72,920)

**Table S13:** Substituting 3<sup>rd</sup> trimester pollution and weather values for residuals of these measures on their respective values for the 1<sup>st</sup> and 2<sup>nd</sup> trimesters (all pregnancies, n=79,328; term births, n=72,920)

Table S1: categorical analysis controlling for activity in thermal power plants and oil refinery (all pregnancies, n=79,328; term births, n=72,920)

| Characteristic                                      | All pregnancies       | Only full term pregnancies |                       |
|-----------------------------------------------------|-----------------------|----------------------------|-----------------------|
|                                                     | Preterm Birth<br>(1)  | Birth weight<br>(2)        | LBW<br>(3)            |
| $30 \leq PM_{10} \leq 49$ 1st trimester             | 0.98<br>[0.82.1.17]   | -11.43<br>[-31.15.8.29]    | 1.04<br>[0.78.1.38]   |
| $50 \leq PM_{10} \leq 69$ 1st trimester             | 0.81<br>[0.62.1.06]   | -3.67<br>[-33.03.25.69]    | 0.98<br>[0.63.1.51]   |
| $70 \leq PM_{10}$ 1st trimester                     | 0.58<br>[0.36.0.92]*  | -29.13<br>[-82.08.23.82]   | 1.24<br>[0.59.2.60]   |
| $30 \leq PM_{10} \leq 49$ 2 <sup>nd</sup> trimester | 0.80<br>[0.64.0.99]*  | 16.97<br>[-4.14.38.08]     | 1.11<br>[0.82.1.50]   |
| $50 \leq PM_{10} \leq 69$ 2 <sup>nd</sup> trimester | 0.67<br>[0.49.0.91]** | 32.76<br>[-0.17.65.69]#    | 1.22<br>[0.76.1.96]   |
| $70 \leq PM_{10}$ 2 <sup>nd</sup> trimester         | 0.69<br>[0.44.1.11]   | 118.09<br>[69.43.166.76]** | 0.82<br>[0.40.1.68]   |
| $30 \leq PM_{10} \leq 49$ 3 <sup>rd</sup> trimester | 0.93<br>[0.77.1.11]   | -2.29<br>[-21.78.17.21]    | 0.79<br>[0.60.1.04]#  |
| $50 \leq PM_{10} \leq 69$ 3 <sup>rd</sup> trimester | 1.34<br>[0.98.1.84]#  | 68.24<br>[37.50.98.99]**   | 0.49<br>[0.32.0.76]** |
| $70 \leq PM_{10}$ 3 <sup>rd</sup> trimester         | 4.99<br>[3.11.8.00]** | 16.83<br>[-26.70.60.37]    | 0.74<br>[0.40.1.36]   |

Notes: Odd ratios for dichotomous variables (PTB, LBW), coefficients for continuous variables (BW). Confidence intervals in parentheses. Apart from the variables mentioned in the title of the table, the regressions adjust for maternal age, education, and marital status, pregnancy conditions, maternal smoking status, onset of prenatal care, temperature, rain, humidity, air pressure, and wind intensity in each trimester of pregnancy, indicators for calendar quarter of gestation (a dichotomous indicator for each calendar quarter between June 2009 and March 2013), and indicators for prenatal care center. Both for the PM10 and weather variables, 3<sup>rd</sup> trimester values are averaged across gestation weeks 28 and 36 (or an earlier week if the pregnancy did not reach full term) when the outcome is PTB. In the case of BW or LBW, 3<sup>rd</sup> trimester averages consider the full length of the trimester until birth. \*\*p<0.01; \*p<0.05; # p<0.1.

Table S2: Categorical effects of PM10 on birth outcomes controlling for CO, NO<sub>2</sub>, SO<sub>2</sub> (all pregnancies, n=79,252; term births, n=72,920)

| Characteristic                                       | All pregnancies         | Only full term pregnancies  |                         |
|------------------------------------------------------|-------------------------|-----------------------------|-------------------------|
|                                                      | Prematurity<br>(1)      | Birth weight<br>(2)         | LBW<br>(3)              |
| 30 ≤ PM <sub>10</sub> ≤ 49 1st trimester             | 1.09<br>[0.93,1.29]     | -30.77<br>[-49.54,-11.99]** | 1.16<br>[0.889,1.515]   |
| 50 ≤ PM <sub>10</sub> ≤ 69 1st trimester             | 1.15<br>[0.87,1.51]     | -28.4<br>[-55.58,-1.21]*    | 1.15<br>[0.771,1.716]   |
| 70 ≤ PM <sub>10</sub> 1st trimester                  | 1.45<br>[0.92,2.26]     | -25.89<br>[-78.46,26.68]    | 1.28<br>[0.612,2.688]   |
| 30 ≤ PM <sub>10</sub> ≤ 49 2 <sup>nd</sup> trimester | 0.92<br>[0.74,1.13]     | 15.06<br>[-5.53,35.65]      | 0.98<br>[0.728,1.316]   |
| 50 ≤ PM <sub>10</sub> ≤ 69 2 <sup>nd</sup> trimester | 1.26<br>[0.94,1.68]     | 51.67<br>[17.74,85.60]**    | 1<br>[0.625,1.597]      |
| 70 ≤ PM <sub>10</sub> 2 <sup>nd</sup> trimester      | 1.02<br>[0.67,1.56]     | 123.22<br>[76.40,170.03]**  | 0.7<br>[0.360,1.377]    |
| 30 ≤ PM <sub>10</sub> ≤ 49 3 <sup>rd</sup> trimester | 0.98<br>[0.83,1.17]     | -8.06<br>[-26.84,10.72]     | 0.86<br>[0.658,1.137]   |
| 50 ≤ PM <sub>10</sub> ≤ 69 3 <sup>rd</sup> trimester | 1.67<br>[1.19,2.35]**   | 89.51<br>[58.00,121.02]**   | 0.43<br>[0.277,0.661]** |
| 70 ≤ PM <sub>10</sub> 3 <sup>rd</sup> trimester      | 16.35<br>[9.26,28.88]** | 66.84<br>[19.29,114.39]**   | 0.52<br>[0.275,0.997]*  |

Notes: Odd ratios for dichotomous variables (PTB, LBW), coefficients for continuous variables (BW). Confidence intervals in parentheses. Apart from the variables mentioned in the title of the table, the regressions adjust for maternal age, education, and marital status, pregnancy conditions, maternal smoking status, onset of prenatal care, temperature, rain, humidity, air pressure, and wind intensity in each trimester of pregnancy, indicators for calendar quarter of gestation (a dichotomous indicator for each calendar quarter between June 2009 and March 2013), and indicators for prenatal care center. Both for the PM10 and weather variables, 3<sup>rd</sup> trimester values are averaged across gestation weeks 28 and 36 (or an earlier week if the pregnancy did not reach full term) when the outcome is PTB. In the case of BW or LBW, 3<sup>rd</sup> trimester averages consider the full length of the trimester until birth. \*\*p<0.01; \*p<0.05.

Table S3: Categorical effects of PM10 on birth outcomes controlling for CO (all pregnancies, n=79,297; term births, n=72,920)

| Characteristic                                       | All pregnancies          | Only full term pregnancies |                         |
|------------------------------------------------------|--------------------------|----------------------------|-------------------------|
|                                                      | Preterm Birth            | Birth weight               | LBW                     |
|                                                      | (1)                      | (2)                        | (3)                     |
| 30 ≤ PM <sub>10</sub> ≤ 49 1st trimester             | 1.01<br>[0.85,1.18]      | -18.12<br>[-35.41,-0.83]*  | 1.1<br>[0.865,1.408]    |
| 50 ≤ PM <sub>10</sub> ≤ 69 1st trimester             | 1.11<br>[0.86,1.43]      | -10.13<br>[-35.40,15.14]   | 1.04<br>[0.719,1.507]   |
| 70 ≤ PM <sub>10</sub> 1st trimester                  | 1.58<br>[1.02,2.45]*     | -18.53<br>[-68.75,31.68]   | 1.26<br>[0.629,2.522]   |
| 30 ≤ PM <sub>10</sub> ≤ 49 2 <sup>nd</sup> trimester | 0.79<br>[0.64,0.97]*     | 20.72<br>[1.08,40.35]*     | 0.97<br>[0.731,1.280]   |
| 50 ≤ PM <sub>10</sub> ≤ 69 2 <sup>nd</sup> trimester | 1.14<br>[0.87,1.51]      | 49.49<br>[17.25,81.73]**   | 1.05<br>[0.674,1.652]   |
| 70 ≤ PM <sub>10</sub> 2 <sup>nd</sup> trimester      | 1.07<br>[0.70,1.62]      | 124.69<br>[79.99,169.39]** | 0.71<br>[0.377,1.352]   |
| 30 ≤ PM <sub>10</sub> ≤ 49 3 <sup>rd</sup> trimester | 0.97<br>[0.82,1.15]      | -4.84<br>[-23.19,13.52]    | 0.82<br>[0.627,1.076]   |
| 50 ≤ PM <sub>10</sub> ≤ 69 3 <sup>rd</sup> trimester | 2.03<br>[1.48,2.78]**    | 90.44<br>[59.51,121.36]**  | 0.43<br>[0.284,0.666]** |
| 70 ≤ PM <sub>10</sub> 3 <sup>rd</sup> trimester      | 18.76<br>[10.81,32.54]** | 58.46<br>[12.26,104.66]*   | 0.6<br>[0.318,1.115]    |

Notes: Odd ratios for dichotomous variables (PTB, LBW), coefficients for continuous variables (BW). Confidence intervals in parentheses. Apart from the variable mentioned in the title of the table, the regressions adjust for maternal age, education, and marital status, pregnancy conditions, maternal smoking status, onset of prenatal care, temperature, rain, humidity, air pressure, and wind intensity in each trimester of pregnancy, indicators for calendar quarter of gestation (a dichotomous indicator for each calendar quarter between June 2009 and March 2013), and indicators for prenatal care center. Both for the PM10 and weather variables, 3<sup>rd</sup> trimester values are averaged across gestation weeks 28 and 36 (or an earlier week if the pregnancy did not reach full term) when the outcome is PTB. In the case of BW or LBW, 3<sup>rd</sup> trimester averages consider the full length of the trimester until birth. \*\*p<0.01; \*p<0.05; # p<0.1.

Table S4: Categorical effects of PM10 on birth outcomes controlling for SO<sub>2</sub> (all pregnancies, N=79,323; term births, N=72,920)

| Characteristic                                       | All pregnancies        | Only full term pregnancies |                         |
|------------------------------------------------------|------------------------|----------------------------|-------------------------|
|                                                      | Preterm Birth          | Birth weight               | LBW                     |
|                                                      | (1)                    | (2)                        | (3)                     |
| 30 ≤ PM <sub>10</sub> ≤ 49 1st trimester             | 1.05<br>[0.89,1.25]    | -20.06<br>[-38.07,-2.05]*  | 1.08<br>[0.834,1.397]   |
| 50 ≤ PM <sub>10</sub> ≤ 69 1st trimester             | 1.12<br>[0.85,1.46]    | -30.36<br>[-57.22,-3.50]*  | 1.12<br>[0.755,1.662]   |
| 70 ≤ PM <sub>10</sub> 1st trimester                  | 1.03<br>[0.68,1.56]    | -56.43<br>[-105.52,-7.34]* | 1.44<br>[0.718,2.881]   |
| 30 ≤ PM <sub>10</sub> ≤ 49 2 <sup>nd</sup> trimester | 0.88<br>[0.71,1.09]    | 11.34<br>[-8.73,31.42]     | 0.99<br>[0.744,1.313]   |
| 50 ≤ PM <sub>10</sub> ≤ 69 2 <sup>nd</sup> trimester | 1.01<br>[0.77,1.33]    | 27.26<br>[-4.04,58.57]#    | 1.11<br>[0.709,1.727]   |
| 70 ≤ PM <sub>10</sub> 2 <sup>nd</sup> trimester      | 1.14<br>[0.76,1.71]    | 93.22<br>[49.11,137.34]**  | 0.8<br>[0.423,1.512]    |
| 30 ≤ PM <sub>10</sub> ≤ 49 3 <sup>rd</sup> trimester | 1.01<br>[0.86,1.19]    | -1.68<br>[-19.91,16.55]    | 0.8<br>[0.614,1.044]    |
| 50 ≤ PM <sub>10</sub> ≤ 69 3 <sup>rd</sup> trimester | 1.4<br>[1.02,1.90]*    | 72.82<br>[43.43,102.21]**  | 0.48<br>[0.318,0.718]** |
| 70 ≤ PM <sub>10</sub> 3 <sup>rd</sup> trimester      | 6.61<br>[4.29,10.20]** | 30.91<br>[-12.34,74.16]    | 0.7<br>[0.382,1.267]    |

Notes: Odd ratios for dichotomous variables (PTB, LBW), coefficients for continuous variables (BW). Confidence intervals in parentheses. Apart from the variable mentioned in the title of the table, the regressions adjust for maternal age, education, and marital status, pregnancy conditions, maternal smoking status, onset of prenatal care, temperature, rain, humidity, air pressure, and wind intensity in each trimester of pregnancy, indicators for calendar quarter of gestation (a dichotomous indicator for each calendar quarter between June 2009 and March 2013), and indicators for prenatal care center. Both for the PM10 and weather variables, 3<sup>rd</sup> trimester values are averaged across gestation weeks 28 and 36 (or an earlier week if the pregnancy did not reach full term) when the outcome is PTB. In the case of BW or LBW, 3<sup>rd</sup> trimester averages consider the full length of the trimester until birth. \*\*p<0.01; \*p<0.05; # p<0.1.

Table S5: Categorical effects of PM10 on birth outcomes controlling for NO<sub>2</sub> (all pregnancies, n=79,277; term births, n=72,920)

| Characteristic                                       | All pregnancies       | Only full term pregnancies |                         |
|------------------------------------------------------|-----------------------|----------------------------|-------------------------|
|                                                      | Preterm birth<br>(1)  | Birth weight<br>(2)        | LBW<br>(3)              |
| 30 ≤ PM <sub>10</sub> ≤ 49 1st trimester             | 0.94<br>[0.80,1.10]   | [-33.01,1.16]#<br>-7.63    | 1.1<br>[0.869,1.398]    |
| 50 ≤ PM <sub>10</sub> ≤ 69 1st trimester             | 0.79<br>[0.61,1.02]#  | [-32.38,17.11]<br>-10.58   | 0.97<br>[0.675,1.385]   |
| 70 ≤ PM <sub>10</sub> 1st trimester                  | 0.59<br>[0.40,0.87]** | [-57.65,36.50]<br>19.22    | 1.04<br>[0.538,2.029]   |
| 30 ≤ PM <sub>10</sub> ≤ 49 2 <sup>nd</sup> trimester | 0.83<br>[0.67,1.03]#  | [-0.23,38.67]#<br>45.41    | 0.98<br>[0.741,1.290]   |
| 50 ≤ PM <sub>10</sub> ≤ 69 2 <sup>nd</sup> trimester | 0.76<br>[0.59,0.99]*  | [14.78,76.03]**<br>118.09  | 1.05<br>[0.675,1.623]   |
| 70 ≤ PM <sub>10</sub> 2 <sup>nd</sup> trimester      | 0.75<br>[0.51,1.12]   | [73.95,162.23]**<br>-14.13 | 0.7<br>[0.368,1.338]    |
| 30 ≤ PM <sub>10</sub> ≤ 49 3 <sup>rd</sup> trimester | 1<br>[0.85,1.18]      | [-32.42,4.16]<br>54.11     | 0.87<br>[0.669,1.143]   |
| 50 ≤ PM <sub>10</sub> ≤ 69 3 <sup>rd</sup> trimester | 1.29<br>[0.96,1.74]#  | [25.18,83.04]**<br>29.23   | 0.54<br>[0.364,0.812]** |
| 70 ≤ PM <sub>10</sub> 3 <sup>rd</sup> trimester      | 5.01<br>[3.19,7.87]** | [-14.87,73.33]<br>12.89    | 0.73<br>[0.396,1.343]   |

Notes: Odd ratios for dichotomous variables (PTB, LBW), coefficients for continuous variables (BW). Confidence intervals in parentheses. Apart from the variable mentioned in the title of the table, the regressions adjust for maternal age, education, and marital status, pregnancy conditions, maternal smoking status, onset of prenatal care, temperature, rain, humidity, air pressure, and wind intensity in each trimester of pregnancy, indicators for calendar quarter of gestation (a dichotomous indicator for each calendar quarter between June 2009 and March 2013), and indicators for prenatal care center. Both for the PM10 and weather variables, 3<sup>rd</sup> trimester values are averaged across gestation weeks 28 and 36 (or an earlier week if the pregnancy did not reach full term) when the outcome is PTB. In the case of BW or LBW, 3<sup>rd</sup> trimester averages consider the full length of the trimester until birth. \*\*p<0.01; \*p<0.05; # p<0.1.

Table S6: Excluding observations with missing values on eclampsia, hypertension, parity, and smoking (all pregnancies, n=63,865; term births, n=58,713)

| Characteristic                                       | All pregnancies       | Only full term pregnancies |                       |
|------------------------------------------------------|-----------------------|----------------------------|-----------------------|
|                                                      | Preterm Birth         | Birth weight               | LBW                   |
|                                                      | (1)                   | (2)                        | (3)                   |
| 30 ≤ PM <sub>10</sub> ≤ 49 1st trimester             | 0.90<br>[0.75.1.08]   | -12.56<br>[-31.09.5.97]    | 1.04<br>[0.80.1.36]   |
| 50 ≤ PM <sub>10</sub> ≤ 69 1st trimester             | 0.79<br>[0.60.1.04]#  | -10.41<br>[-37.65.16.83]   | 1.02<br>[0.69.1.52]   |
| 70 ≤ PM <sub>10</sub> 1st trimester                  | 0.59<br>[0.38.0.91]*  | -30.01<br>[-82.20.22.19]   | 1.44<br>[0.70.2.96]   |
| 30 ≤ PM <sub>10</sub> ≤ 49 2 <sup>nd</sup> trimester | 0.77<br>[0.61.0.97]*  | 11.06<br>[-10.50.32.62]    | 0.93<br>[0.69.1.26]   |
| 50 ≤ PM <sub>10</sub> ≤ 69 2 <sup>nd</sup> trimester | 0.77<br>[0.58.1.02]#  | 28.72<br>[-4.27.61.71]#    | 1.20<br>[0.75.1.91]   |
| 70 ≤ PM <sub>10</sub> 2 <sup>nd</sup> trimester      | 0.86<br>[0.56.1.33]   | 103.46<br>[55.39.151.53]** | 0.76<br>[0.38.1.53]   |
| 30 ≤ PM <sub>10</sub> ≤ 49 3 <sup>rd</sup> trimester | 0.7<br>[0.81.1.16]    | -14.78<br>[-35.02.5.45]    | 0.83<br>[0.62.1.12]   |
| 50 ≤ PM <sub>10</sub> ≤ 69 3 <sup>rd</sup> trimester | 1.36<br>[0.98.1.87]#  | 48.99<br>[17.31.80.67]**   | 0.49<br>[0.32.0.77]** |
| 70 ≤ PM <sub>10</sub> 3 <sup>rd</sup> trimester      | 6.04<br>[3.75.9.75]** | 30.88<br>[-16.61.78.37]    | 0.71<br>[0.36.1.37]   |

Notes: Odd ratios for dichotomous variables (PTB, LBW), coefficients for continuous variables (BW). Confidence intervals in parentheses. Regression adjusts for maternal age, education, and marital status, pregnancy conditions, maternal smoking status, onset of prenatal care, temperature, rain, humidity, air pressure, and wind intensity in each trimester of pregnancy, indicators for calendar quarter of gestation (a dichotomous indicator for each calendar quarter between June 2009 and March 2013), and indicators for prenatal care center. Both for the PM10 and weather variables, 3<sup>rd</sup> trimester values are averaged across gestation weeks 28 and 36 (or an earlier week if the pregnancy did not reach full term) when the outcome is PTB. In the case of BW or LBW, 3<sup>rd</sup> trimester averages consider the full length of the trimester until birth. \*\*p<0.01; \*p<0.05; # p<0.1.



Table S7: Categorical effects of PM10 on birth outcomes for pregnancies conceived before or during the volcano eruptions (all pregnancies, n=51,106; term births, n=46,883)

| Characteristic                                       | All pregnancies        | Only full term pregnancies |                       |
|------------------------------------------------------|------------------------|----------------------------|-----------------------|
|                                                      | Preterm Birth<br>(1)   | Birth weight<br>(2)        | LBW<br>(3)            |
| 30 ≤ PM <sub>10</sub> ≤ 49 1st trimester             | 0.65<br>[0.47,0.90]**  | 16.56<br>[-17.95,51.06]    | 1.12<br>[0.68,1.85]   |
| 50 ≤ PM <sub>10</sub> ≤ 69 1st trimester             | 0.61<br>[0.42,0.88]**  | 14.08<br>[-25.94,54.10]    | 1.11<br>[0.61,1.99]   |
| 70 ≤ PM <sub>10</sub> 1st trimester                  | 0.57<br>[0.34,0.95]*   | -13.92<br>[-71.47,43.63]   | 1.38<br>[0.61,3.13]   |
| 30 ≤ PM <sub>10</sub> ≤ 49 2 <sup>nd</sup> trimester | 0.51<br>[0.36,0.71]**  | 32.65<br>[-0.16,65.46]#    | 0.62<br>[0.37,1.01]#  |
| 50 ≤ PM <sub>10</sub> ≤ 69 2 <sup>nd</sup> trimester | 0.46<br>[0.32,0.66]**  | 43.06<br>[4.50,81.62]*     | 0.71<br>[0.39,1.29]   |
| 70 ≤ PM <sub>10</sub> 2 <sup>nd</sup> trimester      | 0.51<br>[0.33,0.81]**  | 130.61<br>[80.88,180.34]** | 0.46<br>[0.22,0.98]*  |
| 30 ≤ PM <sub>10</sub> ≤ 49 3 <sup>rd</sup> trimester | 1.08<br>[0.88,1.33]    | -0.32<br>[-20.78,20.14]    | 0.75<br>[0.56,1.00]#  |
| 50 ≤ PM <sub>10</sub> ≤ 69 3 <sup>rd</sup> trimester | 1.65<br>[1.20,2.27]**  | 84.70<br>[51.76,117.64]**  | 0.48<br>[0.30,0.76]** |
| 70 ≤ PM <sub>10</sub> 3 <sup>rd</sup> trimester      | 7.03<br>[4.25,11.62]** | 50.45<br>[1.10,99.80]*     | 0.76<br>[0.38,1.53]   |

Notes: Odd ratios for dichotomous variables (PTB, LBW), coefficients for continuous variables (BW). Confidence intervals in parentheses. Regression adjusts for maternal age, education, and marital status, pregnancy conditions, maternal smoking status, onset of prenatal care, temperature, rain, humidity, air pressure, and wind intensity in each trimester of pregnancy, indicators for calendar quarter of gestation (a dichotomous indicator for each calendar quarter between June 2009 and March 2013), and indicators for prenatal care center. Both for the PM10 and weather variables, 3<sup>rd</sup> trimester values are averaged across gestation weeks 28 and 36 (or an earlier week if the pregnancy did not reach full term) when the outcome is PTB. In the case of BW or LBW, 3<sup>rd</sup> trimester averages consider the full length of the trimester until birth. \*\*p<0.01; \*p<0.05; # p<0.1

Table S8: Categorical effects of PM10 on birth outcomes for pregnancies conceived during or after the volcano eruptions (all pregnancies, n=53,969; term births, n=50,147 (BW), n=50,135 (LBW))

| Characteristic                                       | All pregnancies         | Only full term pregnancies |                      |
|------------------------------------------------------|-------------------------|----------------------------|----------------------|
|                                                      | Preterm Birth           | Birth weight               | LBW                  |
|                                                      | (1)                     | (2)                        | (3)                  |
| 30 ≤ PM <sub>10</sub> ≤ 49 1st trimester             | 1.08<br>[0.89,1.32]     | -25.48<br>[-45.88,-5.08]*  | 1.23<br>[0.90,1.68]  |
| 50 ≤ PM <sub>10</sub> ≤ 69 1st trimester             | 0.96<br>[0.69,1.31]     | -21.71<br>[-50.36,6.93]    | 1.17<br>[0.77,1.79]  |
| 70 ≤ PM <sub>10</sub> 1st trimester                  | 0.70<br>[0.44,1.13]     | -50.14<br>[-102.41,2.12]#  | 1.65<br>[0.77,3.53]  |
| 30 ≤ PM <sub>10</sub> ≤ 49 2 <sup>nd</sup> trimester | 0.95<br>[0.75,1.21]     | 3.23<br>[-17.59,24.05]     | 1.14<br>[0.84,1.53]  |
| 50 ≤ PM <sub>10</sub> ≤ 69 2 <sup>nd</sup> trimester | 1.06<br>[0.77,1.47]     | 23.11<br>[-11.75,57.96]    | 1.37<br>[0.81,2.30]  |
| 70 ≤ PM <sub>10</sub> 2 <sup>nd</sup> trimester      | 1.49<br>[0.94,2.37]#    | 96.91<br>[47.80,146.01]**  | 0.99<br>[0.47,2.06]  |
| 30 ≤ PM <sub>10</sub> ≤ 49 3 <sup>rd</sup> trimester | 0.85<br>[0.68,1.06]     | 13.63<br>[-9.63,36.89]     | 0.79<br>[0.57,1.10]  |
| 50 ≤ PM <sub>10</sub> ≤ 69 3 <sup>rd</sup> trimester | 1.55<br>[1.09,2.20]*    | 69.31<br>[35.54,103.09]**  | 0.56<br>[0.34,0.93]* |
| 70 ≤ PM <sub>10</sub> 3 <sup>rd</sup> trimester      | 14.27<br>[8.49,23.98]** | 27.04<br>[-20.95,75.03]    | 0.92<br>[0.46,1.85]  |

Notes: Odd ratios for dichotomous variables (PTB, LBW), coefficients for continuous variables (BW). Confidence intervals in parentheses. Regression adjusts for maternal age, education, and marital status, pregnancy conditions, maternal smoking status, onset of prenatal care, temperature, rain, humidity, air pressure, and wind intensity in each trimester of pregnancy, indicators for calendar quarter of gestation (a dichotomous indicator for each calendar quarter between June 2009 and March 2013), and indicators for prenatal care center. Both for the PM10 and weather variables, 3<sup>rd</sup> trimester values are averaged across gestation weeks 28 and 36 (or an earlier week if the pregnancy did not reach full term) when the outcome is PTB. In the case of BW or LBW, 3<sup>rd</sup> trimester averages consider the full length of the trimester until birth. \*\*p<0.01; \*p<0.05; # p<0.1.

Table S9: Effects of average PM10 concentration on birth outcomes for pregnancies not exposed to the volcano eruptions (all pregnancies, n=53,062; term births, n=48,699)

| Characteristic                                         | All pregnancies      | Only full term pregnancies |                     |
|--------------------------------------------------------|----------------------|----------------------------|---------------------|
|                                                        | Preterm Birth<br>(1) | Birth weight<br>(2)        | LBW<br>(3)          |
| PM10 1st trimester (per 10 µg/m <sup>3</sup> increase) | 1.13<br>[0.99,1.29]# | -10.92<br>[-25.50,3.65]    | 1.04<br>[0.86,1.27] |
| PM10 2nd trimester (per 10 µg/m <sup>3</sup> increase) | 1.06<br>[0.85,1.33]  | 4.09<br>[-23.29,31.47]     | 1.00<br>[0.69,1.46] |
| PM10 3rd trimester (per 10 µg/m <sup>3</sup> increase) | 1.15<br>[0.93,1.42]  | 24.44<br>[0.88,48.00]*     | 0.77<br>[0.56,1.07] |

Notes: Odd ratios for dichotomous variables (PTB, LBW), coefficients for continuous variables (BW). Confidence intervals in parentheses. Regression adjusts for maternal age, education, and marital status, pregnancy conditions, maternal smoking status, onset of prenatal care, temperature, rain, humidity, air pressure, and wind intensity in each trimester of pregnancy, indicators for calendar quarter of gestation (a dichotomous indicator for each calendar quarter between June 2009 and March 2013), and indicators for prenatal care center. Both for the PM10 and weather variables, 3<sup>rd</sup> trimester values are averaged across gestation weeks 28 and 36 (or an earlier week if the pregnancy did not reach full term) when the outcome is PTB. In the case of BW or LBW, 3<sup>rd</sup> trimester averages consider the full length of the trimester until birth. \*p<0.05; # p<0.1. Sample includes pregnancies with a date of delivery before June 8<sup>th</sup> 2011 and pregnancies with a date of conception after December 30<sup>th</sup> 2011.

Table S10: Categorical effects of PM10 on birth outcomes for pregnancies not exposed to the volcano eruptions (all pregnancies, n=53,019; term births, n=48,699)

| Characteristic                                      | All pregnancies      | Only full term pregnancies |                     |
|-----------------------------------------------------|----------------------|----------------------------|---------------------|
|                                                     | Preterm Birth        | Birth weight               | LBW                 |
|                                                     | (1)                  | (2)                        | (3)                 |
| $30 \leq PM_{10} \leq 49$ 1st trimester             | 1.17<br>[0.98,1.39]# | -27.45<br>[-46.47,-8.43]** | 1.11<br>[0.86,1.43] |
| $30 \leq PM_{10} \leq 49$ 2 <sup>nd</sup> trimester | 1.17<br>[0.86,1.60]  | 16.42<br>[-13.18,46.03]    | 1.15<br>[0.77,1.72] |
| $30 \leq PM_{10} \leq 49$ 3 <sup>rd</sup> trimester | 1.35<br>[1.03,1.77]* | -21.31<br>[-57.26,14.65]   | 0.81<br>[0.47,1.41] |
| $50 \leq PM_{10} \leq 69$ 3 <sup>rd</sup> trimester | N/A                  | 43.42<br>[-47.01,133.84]   | 0.47<br>[0.14,1.57] |

Notes: Odd ratios for dichotomous variables (PTB, LBW), coefficients for continuous variables (BW). Confidence intervals in parentheses. Regression adjusts for maternal age, education, and marital status, pregnancy conditions, maternal smoking status, onset of prenatal care, temperature, rain, humidity, air pressure, and wind intensity in each trimester of pregnancy, indicators for calendar quarter of gestation (a dichotomous indicator for each calendar quarter between June 2009 and March 2013), and indicators for prenatal care center. Both for the PM10 and weather variables, 3<sup>rd</sup> trimester values are averaged across gestation weeks 28 and 36 (or an earlier week if the pregnancy did not reach full term) when the outcome is PTB. In the case of BW or LBW, 3<sup>rd</sup> trimester averages consider the full length of the trimester until birth. \*\*p<0.01; \*p<0.05; # p<0.1. Sample includes pregnancies with a date of delivery before June 8<sup>th</sup> 2011 and pregnancies with a date of conception after December 30<sup>th</sup> 2011. N/A – not applicable. Only 156 observations (out of 53062) were exposed to trimester average levels of PM10 above 50 µg/m3 in the period.

Table S11: Substituting 1<sup>st</sup> trimester pollution and weather values for residuals of these measures on their respective values for the 2<sup>nd</sup> and 3<sup>rd</sup> trimesters (all pregnancies, n=79,328; term births, n=72,920)

| Characteristic                                         | All pregnancies       | Only full term pregnancies |                     |
|--------------------------------------------------------|-----------------------|----------------------------|---------------------|
|                                                        | Preterm Birth<br>(1)  | Birth weight<br>(2)        | LBW<br>(3)          |
| PM10 1st trimester (per 10 µg/m <sup>3</sup> increase) | 0.99<br>[0.91,1.06]   | -3.03<br>[-11.27,5.22]     | 1.04<br>[0.93,1.17] |
| PM10 2nd trimester (per 10 µg/m <sup>3</sup> increase) | 0.95<br>[0.86,1.06]   | 10.84<br>[0.12,21.57]*     | 1.04<br>[0.89,1.22] |
| PM10 3rd trimester (per 10 µg/m <sup>3</sup> increase) | 1.11<br>[1.03,1.19]** | -5.39<br>[-14.73,3.95]     | 0.93<br>[0.80,1.08] |

Notes: Odd ratios for dichotomous variables (PTB, LBW), coefficients for continuous variables (BW). Confidence intervals in parentheses. Regression adjusts for maternal age, education, and marital status, pregnancy conditions, maternal smoking status, onset of prenatal care, temperature, rain, humidity, air pressure, and wind intensity in each trimester of pregnancy, indicators for calendar quarter of gestation (a dichotomous indicator for each calendar quarter between June 2009 and March 2013), and indicators for prenatal care center. Both for the PM10 and weather variables, 3<sup>rd</sup> trimester values are averaged across gestation weeks 28 and 36 (or an earlier week if the pregnancy did not reach full term) when the outcome is PTB. In the case of BW or LBW, 3<sup>rd</sup> trimester averages consider the full length of the trimester until birth. \*\*p<0.01; \*p<0.05; # p<0.1.

Table S12: Substituting 2<sup>nd</sup> trimester pollution and weather values for residuals of these measures on their respective values for 1<sup>st</sup> and 3<sup>rd</sup> trimesters (all pregnancies, n=79,328; term births, n=72,920)

| Characteristic                             | All pregnancies      | Only full term pregnancies |                      |
|--------------------------------------------|----------------------|----------------------------|----------------------|
|                                            | Preterm Birth        | Birth weight               | LBW                  |
|                                            | (1)                  | (2)                        | (3)                  |
| PM10 1st trimester (per 10 µg/m3 increase) | 0.97<br>[0.89,1.06]  | 3.00<br>[-6.09,12.10]      | 1.050<br>[0.92,1.20] |
| PM10 2nd trimester (per 10 µg/m3 increase) | 0.96<br>[0.89,1.05]  | 13.10<br>[4.07,22.13]**    | 1.01<br>[0.89,1.15]  |
| PM10 3rd trimester (per 10 µg/m3 increase) | 1.09<br>[1.00,1.18]* | 0.40<br>[-9.83,10.62]      | 0.94<br>[0.81,1.10]  |

Notes: Odd ratios for dichotomous variables (PTB, LBW), coefficients for continuous variables (BW). Confidence intervals in parentheses. Regression adjusts for maternal age, education, and marital status, pregnancy conditions, maternal smoking status, onset of prenatal care, temperature, rain, humidity, air pressure, and wind intensity in each trimester of pregnancy, indicators for calendar quarter of gestation (a dichotomous indicator for each calendar quarter between June 2009 and March 2013), and indicators for prenatal care center. Both for the PM10 and weather variables, 3<sup>rd</sup> trimester values are averaged across gestation weeks 28 and 36 (or an earlier week if the pregnancy did not reach full term) when the outcome is PTB. In the case of BW or LBW, 3<sup>rd</sup> trimester averages consider the full length of the trimester until birth. \*\*p<0.01; \*p<0.05.

Table S13: Substituting 3<sup>rd</sup> trimester pollution and weather values for residuals of these measures on their respective values for the 1<sup>st</sup> and 2<sup>nd</sup> trimesters (all pregnancies, n=79,328; term births, n=72,920)

| Characteristic                                         | All pregnancies       | Only full term pregnancies |                     |
|--------------------------------------------------------|-----------------------|----------------------------|---------------------|
|                                                        | Preterm Birth<br>(1)  | Birth weight<br>(2)        | LBW<br>(3)          |
| PM10 1st trimester (per 10 µg/m <sup>3</sup> increase) | 0.98<br>[0.90,1.056]  | -2.31<br>[-10.80,6.19]     | 1.05<br>[0.93,1.19] |
| PM10 2nd trimester (per 10 µg/m <sup>3</sup> increase) | 1.04<br>[0.94,1.15]   | 8.77<br>[-2.78,20.32]      | 0.96<br>[0.81,1.14] |
| PM10 3rd trimester (per 10 µg/m <sup>3</sup> increase) | 1.10<br>[1.03,1.19]** | -5.78<br>[-14.90,3.35]     | 0.94<br>[0.81,1.08] |

Notes: Odd ratios for dichotomous variables (PTB, LBW), coefficients for continuous variables (BW). Confidence intervals in parentheses. Regression adjusts for maternal age, education, and marital status, pregnancy conditions, maternal smoking status, onset of prenatal care, temperature, rain, humidity, air pressure, and wind intensity in each trimester of pregnancy, indicators for calendar quarter of gestation (a dichotomous indicator for each calendar quarter between June 2009 and March 2013), and indicators for prenatal care center. Both for the PM10 and weather variables, 3<sup>rd</sup> trimester values are averaged across gestation weeks 28 and 36 (or an earlier week if the pregnancy did not reach full term) when the outcome is PTB. In the case of BW or LBW, 3<sup>rd</sup> trimester averages consider the full length of the trimester until birth. \*\*p<0.01; \*p<0.05;.
